# Supplementary material
Source: publisher site journal article supplement (https://www.dovepress.com/article/351141)
Supplement: Supplementary file 1 [file get_supplementary_file.php]

Supplemental Tables and Figures

**Supplemental Table 1. Whitney-Mann-Wilcoxon test on outcome variables**

| **Outcome Variables** | **p-value** | **Obs.** |
| --- | --- | --- |
| # of Asthma Attacks | <0.001 | 349 |
| # of Hospital Visits | 0.436 | 348 |
| # of ER Visits | 0.673 | 348 |
| Physical Health of Children | <0.001 | 345 |
| Activities of Children | <0.001 | 348 |
| Activities of Family | <0.001 | 348 |
| Emotional Health of Children | <0.001 | 347 |
| Emotional Health of Family | <0.001 | 348 |

**Supplemental Table 2. Cost-effectiveness ratios by child’s gender**

| **Category** | **Outcome** | **Cost-Effectiveness Ratio** |
| --- | --- | --- |
| ***Female*** |  |  |
| Asthma Attacks (#) | 27 | 248.30/27 = 9.2 |
| Hospital Visits (#) | 0 |  |
| ER Visits (#) | 7 | 248.30/7 = 35.5 |
| Physical Health of Children (#) | 112 | 248.30/112 = 2.2 |
| Activities of Children (#) | 50 | 248.30/50 = 5.0 |
| Activities of Family (#) | 69 | 248.30/69 = 3.6 |
| Emotional Health of Children (#) | 73 | 248.30/73 = 3.4 |
| Emotional Health of Family (#) | 90 | 248.30/90 = 2.8 |
| ***Male*** |  |  |
| Asthma Attacks (#) | 33 | 248.30/33 = 7.5 |
| Hospital Visits (#) | 3 | 248.30/3 = 82.8 |
| ER Visits (#) | 5 | 248.30/5 = 49.7 |
| Physical Health of Children (#) | 148 | 248.30/148 = 1.7 |
| Activities of Children (#) | 58 | 248.30/58 = 4.3 |
| Activities of Family (#) | 69 | 248.30/69 = 3.6 |
| Emotional Health of Children (#) | 86 | 248.30/86 = 2.9 |
| Emotional Health of Family (#) | 127 | 248.30/127 = 2.0 |
| **Notes:** Cost-effectiveness ratio = average cost/outcome measure; females N = 152, males N = 191; # signifies the number of participants who reported a better outcome (i.e., an increase in the physical health of children, activities of children/family, and emotional health of children/family and a decrease in asthma attacks, hospital visits, and ER visits). | | |

**Supplemental Table 3. Cost-effectiveness ratios by female guardian education**

| **Category** | **Outcome** | **Cost-Effectiveness Ratio** |
| --- | --- | --- |
| ***Less than high school*** |  |  |
| Asthma Attacks (#) | 25 | 248.30/25 = 9.9 |
| Hospital Visits (#) | 1 | 248.30/1 = 248.3 |
| ER Visits (#) | 5 | 248.30/5 = 49.7 |
| Physical Health of Children (#) | 104 | 248.30/104 = 2.4 |
| Activities of Children (#) | 37 | 248.30/37 = 6.7 |
| Activities of Family (#) | 53 | 248.30/53 = 4.7 |
| Emotional Health of Children (#) | 62 | 248.30/62 = 4.0 |
| Emotional Health of Family (#) | 85 | 248.30/85 = 2.9 |
| ***High school graduate*** |  |  |
| Asthma Attacks (#) | 20 | 248.30/20 = 12.4 |
| Hospital Visits (#) | 1 | 248.30/1 = 248.3 |
| ER Visits (#) | 4 | 248.30/4 = 62.1 |
| Physical Health of Children (#) | 80 | 248.30/80 = 3.1 |
| Activities of Children (#) | 38 | 248.30/38 = 6.5 |
| Activities of Family (#) | 43 | 248.30/43 = 5.8 |
| Emotional Health of Children (#) | 53 | 248.30/53 = 4.7 |
| Emotional Health of Family (#) | 66 | 248.30/66 = 3.8 |
| ***More than high school*** |  |  |
| Asthma Attacks (#) | 16 | 248.30/16 = 15.5 |
| Hospital Visits (#) | 1 | 248.30/1 = 248.3 |
| ER Visits (#) | 3 | 248.30/3 = 82.8 |
| Physical Health of Children (#) | 81 | 248.30/81 = 3.1 |
| Activities of Children (#) | 36 | 248.30/36 = 6.9 |
| Activities of Family (#) | 46 | 248.30/46 = 5.4 |
| Emotional Health of Children (#) | 46 | 248.30/46 = 5.4 |
| Emotional Health of Family (#) | 71 | 248.30/71 = 3.5 |
| **Notes:** Cost-effectiveness ratio = average cost/outcome measure; less than high school N = 131, high school graduate N = 104; more than high school N = 113; # signifies the number of participants who reported a better outcome (i.e., an increase in the physical health of children, activities of children/family, and emotional health of children/family and a decrease in asthma attacks, hospital visits, and ER visits). | | |

**Supplemental Table 4. Cost-effectiveness ratios by male guardian education**

| **Category** | **Outcome** | **Cost-Effectiveness Ratio** |
| --- | --- | --- |
| ***Less than high school*** |  |  |
| Asthma Attacks (#) | 31 | 248.30/31 = 8.0 |
| Hospital Visits (#) | 1 | 248.30/1 = 248.3 |
| ER Visits (#) | 5 | 248.30/5 = 49.7 |
| Physical Health of Children (#) | 103 | 248.30/103 = 2.4 |
| Activities of Children (#) | 38 | 248.30/38 = 6.5 |
| Activities of Family (#) | 54 | 248.30/54 = 4.6 |
| Emotional Health of Children (#) | 61 | 248.30/61 = 4.1 |
| Emotional Health of Family (#) | 88 | 248.30/88 = 2.8 |
| ***High school graduate*** |  |  |
| Asthma Attacks (#) | 15 | 248.30/15 = 16.6 |
| Hospital Visits (#) | 1 | 248.30/1 = 248.3 |
| ER Visits (#) | 3 | 248.30/3 = 82.8 |
| Physical Health of Children (#) | 83 | 248.30/83 = 3.0 |
| Activities of Children (#) | 34 | 248.30/34 = 7.3 |
| Activities of Family (#) | 47 | 248.30/47 = 5.3 |
| Emotional Health of Children (#) | 53 | 248.30/53 = 4.7 |
| Emotional Health of Family (#) | 65 | 248.30/65 = 3.8 |
| ***More than high school*** |  |  |
| Asthma Attacks (#) | 9 | 248.30/9 = 27.6 |
| Hospital Visits (#) | 0 |  |
| ER Visits (#) | 1 | 248.30/1 = 248.3 |
| Physical Health of Children (#) | 52 | 248.30/52 = 4.8 |
| Activities of Children (#) | 27 | 248.30/27 = 9.2 |
| Activities of Family (#) | 29 | 248.30/29 = 8.6 |
| Emotional Health of Children (#) | 31 | 248.30/31 = 8.0 |
| Emotional Health of Family (#) | 53 | 248.30/53 = 4.7 |
| **Notes:** Cost-effectiveness ratio = average cost/outcome measure; less than high school N = 126, high school graduate N = 112; more than high school N = 74; # signifies the number of participants who reported a better outcome (i.e., an increase in the physical health of children, activities of children/family, and emotional health of children/family and a decrease in asthma attacks, hospital visits, and ER visits). | | |

**Supplemental Table 5. Cost-effectiveness ratios by guardian income**

| **Category** | | **Outcome** | **Cost-Effectiveness Ratio** |
| --- | --- | --- | --- |
| ***Less than $14,999*** |  | |  |
| Asthma Attacks (#) | | 19 | 248.30/19 = 13.1 |
| Hospital Visits (#) | | 2 | 248.30/2 = 124.2 |
| ER Visits (#) | | 7 | 248.30/7 = 35.5 |
| Physical Health of Children (#) | | 112 | 248.30/112 = 2.2 |
| Activities of Children (#) | | 45 | 248.30/45 = 5.5 |
| Activities of Family (#) | | 67 | 248.30/67 = 3.7 |
| Emotional Health of Children (#) | | 63 | 248.30/63 = 3.9 |
| Emotional Health of Family (#) | | 76 | 248.30/76 = 3.3 |
| ***$15,000 - $29,999*** | |  |  |
| Asthma Attacks (#) | | 24 | 248.30/24 = 10.3 |
| Hospital Visits (#) | | 0 |  |
| ER Visits (#) | | 1 | 248.30/1 = 248.3 |
| Physical Health of Children (#) | | 64 | 248.30/64 = 3.9 |
| Activities of Children (#) | | 34 | 248.30/34 = 7.3 |
| Activities of Family (#) | | 31 | 248.30/31 = 8.0 |
| Emotional Health of Children (#) | | 41 | 248.30/41 = 6.1 |
| Emotional Health of Family (#) | | 66 | 248.30/66 = 3.8 |
| ***$30,000 - $60,000*** | |  |  |
| Asthma Attacks (#) | | 1 | 248.30/1 = 248.3 |
| Hospital Visits (#) | | 0 |  |
| ER Visits (#) | | 1 | 248.30/1 = 248.3 |
| Physical Health of Children (#) | | 9 | 248.30/9 = 27.6 |
| Activities of Children (#) | | 2 | 248.30/2 = 124.2 |
| Activities of Family (#) | | 6 | 248.30/6 = 41.4 |
| Emotional Health of Children (#) | | 6 | 248.30/6 = 41.4 |
| Emotional Health of Family (#) | | 12 | 248.30/12 = 20.7 |
| ***More than $60,000*** | |  |  |
| Asthma Attacks (#) | | 0 |  |
| Hospital Visits (#) | | 0 |  |
| ER Visits (#) | | 0 |  |
| Physical Health of Children (#) | | 1 | 248.30/1 = 248.3 |
| Activities of Children (#) | | 1 | 248.30/1 = 248.3 |
| Activities of Family (#) | | 0 |  |
| Emotional Health of Children (#) | | 0 |  |
| Emotional Health of Family (#) | | 2 | 248.30/2 = 124.2 |
| **Notes:** Cost-effectiveness ratio = average cost/outcome measure; Less than $14,999 N = 173; $15,000 - $29,999 N = 118; $30,000 - $60,000 N = 31; more than $60,000 N = 9; # signifies the number of participants who reported a better outcome (i.e., an increase in the physical health of children, activities of children/family, and emotional health of children/family and a decrease in asthma attacks, hospital visits, and ER visits). | | | |

**Supplemental Table 6. Cost-effectiveness ratios by child age**

| **Category** | **Outcome** | **Cost-Effectiveness Ratio** |
| --- | --- | --- |
| ***0 – 6 years*** |  |  |
| Asthma Attacks (#) | 21 | 248.30/21 = 11.8 |
| Hospital Visits (#) | 1 | 248.30/1 = 248.3 |
| ER Visits (#) | 2 | 248.30/2 = 124.2 |
| Physical Health of Children (#) | 98 | 248.30/98 = 2.5 |
| Activities of Children (#) | 26 | 248.30/26 = 9.6 |
| Activities of Family (#) | 67 | 248.30/67 = 3.7 |
| Emotional Health of Children (#) | 43 | 248.30/43 = 5.8 |
| Emotional Health of Family (#) | 74 | 248.30/74 = 3.4 |
| ***7 – 12 years*** |  |  |
| Asthma Attacks (#) | 29 | 248.30/29 = 8.6 |
| Hospital Visits (#) | 2 | 248.30/2 = 124.2 |
| ER Visits (#) | 7 | 248.30/7 = 35.5 |
| Physical Health of Children (#) | 114 | 248.30/114 = 2.2 |
| Activities of Children (#) | 54 | 248.30/54 = 4.6 |
| Activities of Family (#) | 59 | 248.30/59 = 4.2 |
| Emotional Health of Children (#) | 84 | 248.30/84 = 3.0 |
| Emotional Health of Family (#) | 103 | 248.30/103 = 2.4 |
| ***13 – 19 years*** |  |  |
| Asthma Attacks (#) | 11 | 248.30/11 = 22.6 |
| Hospital Visits (#) | 0 |  |
| ER Visits (#) | 3 | 248.30/3 = 82.8 |
| Physical Health of Children (#) | 52 | 248.30/52 = 4.8 |
| Activities of Children (#) | 30 | 248.30/30 = 8.3 |
| Activities of Family (#) | 16 | 248.30/16 = 15.5 |
| Emotional Health of Children (#) | 33 | 248.30/33 = 7.5 |
| Emotional Health of Family (#) | 44 | 248.30/44 = 5.6 |
| **Notes:** Cost-effectiveness ratio = average cost/outcome measure; 0 – 6 years N = 117, 7 – 12 years N = 161; 13 – 19 N = 70; # signifies the number of participants who reported a better outcome (i.e., an increase in the physical health of children, activities of children/family, and emotional health of children/family and a decrease in asthma attacks, hospital visits, and ER visits). | | |

**Supplemental Table 7. Cost-effectiveness ratios by guardian age**

| **Category** | **Outcome** | **Cost-Effectiveness Ratio** |
| --- | --- | --- |
| ***20 – 30 years*** |  |  |
| Asthma Attacks (#) | 7 | 248.30/7 = 35.5 |
| Hospital Visits (#) | 0 |  |
| ER Visits (#) | 0 |  |
| Physical Health of Children (#) | 51 | 248.30/51 = 4.9 |
| Activities of Children (#) | 19 | 248.30/19 = 13.1 |
| Activities of Family (#) | 31 | 248.30/31 = 8.0 |
| Emotional Health of Children (#) | 34 | 248.30/34 = 7.3 |
| Emotional Health of Family (#) | 32 | 248.30/32 = 7.8 |
| ***31 – 40 years*** |  |  |
| Asthma Attacks (#) | 34 | 248.30/34 = 7.3 |
| Hospital Visits (#) | 2 | 248.30/2 = 124.2 |
| ER Visits (#) | 8 | 248.30/8 = 31.0 |
| Physical Health of Children (#) | 136 | 248.30/136 = 1.8 |
| Activities of Children (#) | 48 | 248.30/48 = 5.2 |
| Activities of Family (#) | 67 | 248.30/67 = 3.7 |
| Emotional Health of Children (#) | 70 | 248.30/70 = 3.5 |
| Emotional Health of Family (#) | 114 | 248.30/114 = 2.2 |
| ***41 – 50 years*** |  |  |
| Asthma Attacks (#) | 18 | 248.30/18 = 13.8 |
| Hospital Visits (#) | 1 | 248.30/1 = 248.3 |
| ER Visits (#) | 3 | 248.30/3 = 82.8 |
| Physical Health of Children (#) | 67 | 248.30/67 = 3.7 |
| Activities of Children (#) | 37 | 248.30/37 = 6.7 |
| Activities of Family (#) | 40 | 248.30/40 = 6.2 |
| Emotional Health of Children (#) | 51 | 248.30/51 = 4.9 |
| Emotional Health of Family (#) | 67 | 248.30/67 = 3.7 |
| ***More than 50 years*** |  |  |
| Asthma Attacks (#) | 2 | 248.30/2 = 124.2 |
| Hospital Visits (#) | 0 |  |
| ER Visits (#) | 1 | 248.30/1 = 248.3 |
| Physical Health of Children (#) | 9 | 248.30/9 = 27.6 |
| Activities of Children (#) | 6 | 248.30/6 = 41.4 |
| Activities of Family (#) | 4 | 248.30/4 = 62.1 |
| Emotional Health of Children (#) | 5 | 248.30/5 = 49.7 |
| Emotional Health of Family (#) | 7 | 248.30/7 = 35.5 |
| **Notes:** Cost-effectiveness ratio = average cost/outcome measure; 20 – 30 years N = 62, 31 – 40 years N = 174; 41 – 50 N = 98; more than 50 years N = 13; # signifies the number of participants who reported a better outcome (i.e., an increase in the physical health of children, activities of children/family, and emotional health of children/family and a decrease in asthma attacks, hospital visits, and ER visits). | | |

**Supplemental Table 8. Cost-effectiveness ratio % change from baseline for 20% change in CHWs wages**

| **Category** | **Outcome** | **Cost-Effectiveness Ratio % Change for 20% Increase** | **Cost-Effectiveness Ratio % Change for 20% Decrease** | |
| --- | --- | --- | --- | --- |
| *Overall:* |  |  |  | |
| Asthma Attacks (#) | 61 | 8.56% | -10.00% | |
| Hospital Visits (#) | 3 | 9.30% | -9.38% | |
| ER Visits (#) | 12 | 9.30% | -9.38% | |
| Physical Health of Children (#) | 265 | 13.84% | -5.62% | |
| Activities of Children (#) | 111 | 11.18% | -7.82% | |
| Activities of Family (#) | 142 | 12.47% | -6.75% | |
| Emotional Health of Children (#) | 161 | 12.42% | -6.79% | |
| Emotional Health of Family (#) | 222 | 11.18% | -7.82% | |
| **Notes:** The average cost per household is $271.50 when CHWs wages are increased by 20% and $225.10 when decreased by 20%. Cost-effectiveness ratio = average cost per household/outcome measure. The outcome measure is the number of participants who reported a better outcome (i.e., an increase in the physical health of children, activities of children/family, and emotional health of children/family and a decrease in asthma attacks, hospital visits, and ER visits). For example, if a participant reports less asthma attacks at the follow-up they are included in the 61 outcome measure. | | | |

**Supplemental Table 9. Cost-effectiveness ratio % change from baseline for 20% change in CHWs mileage**

| **Category** | **Outcome** | **Cost-Effectiveness Ratio % Change for 20% Increase** | **Cost-Effectiveness Ratio % Change for 20% Decrease** | |
| --- | --- | --- | --- | --- |
| *Overall:* |  |  |  | |
| Asthma Attacks (#) | 61 | -0.59% | -0.86% | |
| Hospital Visits (#) | 3 | 0.09% | -0.18% | |
| ER Visits (#) | 12 | 0.09% | -0.18% | |
| Physical Health of Children (#) | 265 | 4.25% | 3.97% | |
| Activities of Children (#) | 111 | 1.81% | 1.54% | |
| Activities of Family (#) | 142 | 3.00% | 2.72% | |
| Emotional Health of Children (#) | 161 | 2.95% | 2.67% | |
| Emotional Health of Family (#) | 222 | 1.81% | 1.54% | |
| **Notes:** The average cost per household is $248.63 when CHWs travel mileage is increased by 20% and $247.96 when decreased by 20%. Cost-effectiveness ratio = average cost per household/outcome measure. The outcome measure is the number of participants who reported a better outcome (i.e., an increase in the physical health of children, activities of children/family, and emotional health of children/family and a decrease in asthma attacks, hospital visits, and ER visits). For example, if a participant reports less asthma attacks at the follow-up they are included in the 61 outcome measure. | | | |

**Supplemental Figure 1. Distribution of the Household Cost Difference**

*
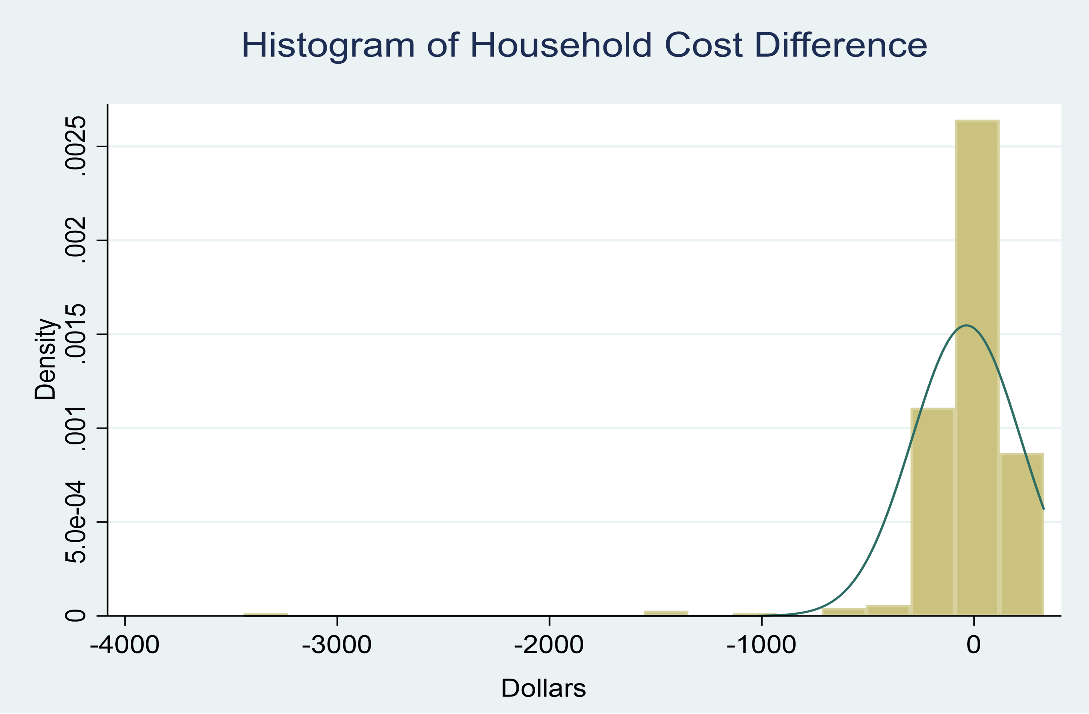
*

**Supplemental Figure 2. Impact on household savings with a ±20% change in costs assumptions**

*
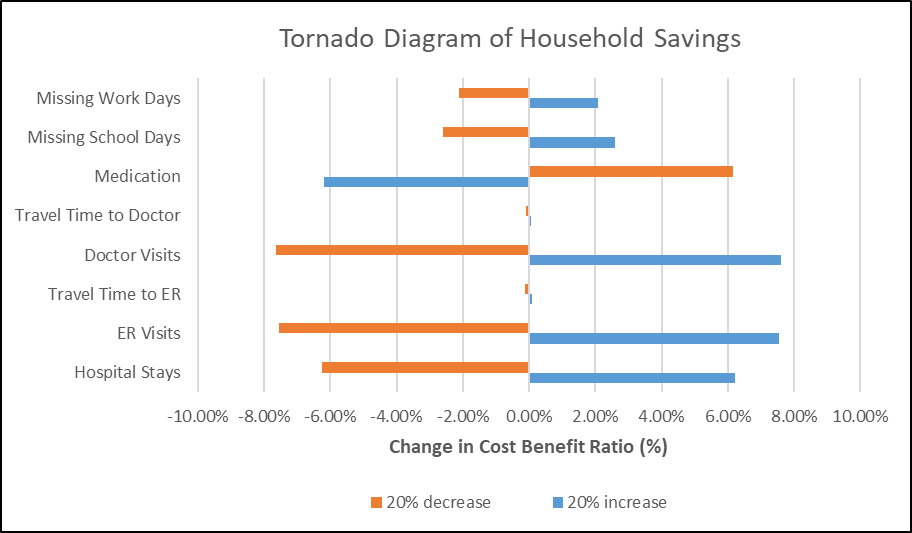
*

**Notes:** Each parameter is increased/decreased by 20% while all other parameters are held constant when calculating the new total cost benefit ratio. Baseline total cost benefit ratio = average total household cost difference/average cost of program per household (36.39/248.30=0.147).
